# Supplementary figures and images for: miR-136 Regulates the Proliferation and Adipogenic Differentiation of Adipose-Derived Stromal Vascular Fractions by Targeting HSD17B12
Source: MDPI journal article supplement (doi:10.3390/ijms241914892), 2023-10-04

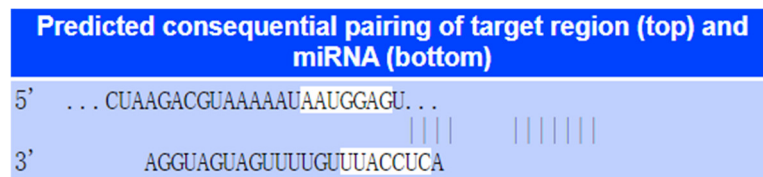

**Figure S1.** Target scan software predicts the binding site of miR-136 and *HSD17B12*.

Supplement: s1 [file s1]
